# Cooperative action of separate interaction domains promotes high-affinity DNA binding of *Arabidopsis thaliana* ARF transcription factors

Mattia Fontana<sup>a,b</sup>, Mark Roosjen<sup>b</sup>, Isidro Crespo García<sup>c</sup>, Willy van den Berg<sup>b</sup>, Marc Malfois<sup>c</sup>, Roeland Boer<sup>c</sup>, Dolf Weijers<sup>b,\*</sup>, and Johannes Hohlbein<sup>a,d,\*</sup>

<sup>a</sup>Laboratory of Biophysics, Wageningen University and Research, Stippeneng 4, 6708 WE Wageningen, The Netherlands; <sup>b</sup>Laboratory of Biochemistry, Wageningen University and Research, Stippeneng 4, 6708 WE Wageningen, The Netherlands; <sup>c</sup>ALBA synchrotron Light Source, Carrer de la Llum 2-26, Cerdanyola del Vallès, 08290, Barcelona, Spain; <sup>d</sup>Microspectroscopy Research Facility, Wageningen University and Research, Stippeneng 4, 6708 WE Wageningen, The Netherlands; \* Correspondence: [dolf.weijers@wur.nl](mailto:dolf.weijers@wur.nl), [johannes.hohlbein@wur.nl](mailto:johannes.hohlbein@wur.nl)

1 The signaling molecule auxin is pivotal in coordinating many growth and development processes in plants mainly through the  
2 modulation of gene expression. The transcriptional response to auxin is mediated by the family of auxin response factors  
3 (ARF). Monomers of this family recognize a DNA motif (TGTC[TC]/[GG]) called the auxin-response element (AuxRE). ARFs  
4 can homodimerize through their DNA binding domains (DBD) thereby enabling cooperative binding for a bipartite inverted  
5 AuxRE (IR7). In addition to the DBD, most ARFs contain a C-terminal Phox and Bem1p (PB1) domain both capable of homotypic  
6 interactions, and mediating interactions with Aux/IAA repressors. Given the dual role of the PB1 domain, and the ability of  
7 both DBD and PB1 domain to mediate dimerization, a key question is how each of these domains contributes to conferring  
8 DNA-binding specificity and affinity. So far, ARF-ARF and ARF-DNA interactions have mostly been approached using qualitative  
9 methods that do not provide a quantitative and dynamic view on the binding equilibria. Here, we utilize a DNA binding assay  
10 based on single-molecule Förster resonance energy transfer (smFRET) to study the affinity and kinetics of the interaction of  
11 several *Arabidopsis thaliana* ARFs with an IR7 AuxRE. We show that both DBD and PB1 domains of AtARF2 contribute toward  
12 DNA binding, and we identify ARF dimer stability as a key parameter in defining affinity and kinetics seen for the DBDs of  
13 different AtARFs. Lastly, we derived an analytical solution for a four-state cyclic model that explains both the kinetics and  
14 the affinity of the interaction between AtARF2 and IR7. Our work demonstrates that the affinity of ARFs towards composite  
15 DNA response elements can be tuned by small changes of their dimerization equilibrium suggesting that this effect has major  
16 implications for ARF-mediated transcriptional activity.

## 1 Introduction

2 The plant signaling molecule auxin plays a major role in many  
3 cellular and developmental processes. Auxin triggers both non-  
4 transcriptional and transcriptional responses with the latter  
5 being controlled by the nuclear auxin pathway(1–5). This  
6 pathway involves three main players: the transcription factor  
7 ARF, its repressor Aux/IAA and the ubiquitin ligase complex  
8 SCF<sup>TIR1/AFB</sup>. Binding of auxin to TIR1/AFB enables the  
9 recognition and ubiquitination of Aux/IAA. Upon degradation  
10 of Aux/IAA, ARF is able to modulate the expression of its  
11 downstream target genes.

12 The interaction between ARFs and Aux/IAAs is mediated by  
13 the C-terminal Phox and Bem1p (PB1) domain present in both  
14 proteins. The PB1 domain features two oppositely charged  
15 surfaces (type I/II or AB [acid basic] PB1 domain) that can  
16 undergo head to tail oligomerization(6–9). Remarkably, this  
17 structural characteristic enables scenarios of homo- and hetero-

oligomerization among and between Aux/IAAs and ARFs. In  
addition to the PB1 domain, ARFs consist of two other do-  
mains, the Middle Region (MR) and the N-terminal DNA  
Binding Domain (DBD). The MR domain is predicted to be  
intrinsically disordered(5) and its amino acid sequence dif-  
fers between the three phylogenetically separated ARF clades  
(A,B and C)(10, 11). When tested for their effect on gene  
expression, some ARFs activate auxin-responsive genes while  
other repress them. In general, class A ARFs (e.g., *A. thaliana*  
ARF5) act as activators while class B (e.g., *A. thaliana* ARF1  
and 2) and C ARFs act as repressor(10). The DBD domain  
physically interacts with its DNA response element called  
AuxRE (auxin-responsive element)(12). This cis-regulatory  
element was first identified in promoters of an auxin-responsive  
genes in pea(13) and soybean(14, 15) and was found to be  
essential for their auxin inducibility. The canonical TGTCTC  
recognition sequence was later shown to be bound by differ-

ent members of the ARF family(12, 16). More recently, the TGTCGG recognition sequence was found to have an even higher affinity for ARFs *in vitro*(17–19) and was used to create an enhanced artificial auxin response reporter(20). Single AuxREs are bound by single ARF monomers but ARF DBDs can dimerize in solution and bind cooperatively to composite response elements bearing two AuxRE in inverted configuration (IR)(17); moreover, ARF dimerization through its DBD is necessary for ARF function *in vivo*(17, 21). Interestingly, the PB1 domain seems to have diverse effects on different class A ARFs as its deletion in *M. polymorpha* ARF1 generates a loss-of-function mutant(22) whereas in *A. thaliana* ARF5 the mutant maintains its function and is hyperactive(23). The effect of the homotypic interaction of ARF PB1 domains of another class A ARF, AtARF19, has been studied using synthetic auxin response circuits in yeast, showing that mutating either the positive or the negative side of the PB1 domain reduces its ability to promote transcription(24).

Although many structures and relevant interactions among the various components of the auxin nuclear pathway have been identified, quantitative data on the affinity and kinetics of these interactions have remained scarce. In particular, the effects of the dimer/monomer equilibrium on the interaction between ARFs and between ARFs and AuxREs, or the effect of mutations on the DBD and PB1 domains on ARF dimerization have not yet been systematically studied, obscuring which interactions might be relevant in a cellular context. Particularly, it is unclear if and how both interaction domains (DBD and PB1) contribute to DNA binding, and what their relative contributions are. Furthermore, it is unclear whether oligomerization of ARF PB1 domains contributes to DNA binding.

Here, we employed a DNA-binding assay based on single-molecule Förster resonance energy transfer (smFRET) to quantitatively assess the binding affinities between different *A. thaliana* ARFs and a response element composed of two AuxREs in an inverted repeat configuration with a spacing of 7 base pairs (IR7). We found that, while the DNA-binding domain alone can bind DNA, the presence of the PB1 domain increases the affinity of AtARF2 towards the tested composite response element. In fact, this effect can be ascribed to increased stability of the dimer, whereas AtARF2 oligomerization has no sizable effect. We introduce a general four-state cyclic model to quantify the mechanisms of ARF interaction with the bipartite DNA response element; the simultaneous analysis of the equilibrium and kinetics data using this model revealed that the increase in affinity can be completely pinned

to the shift in the dimer-monomer equilibrium. Further analysis of variants of AtARF5-DBD and other AtARF-DBDs showed that changes in dimer stability generated by changes in the DBD domain displays the same pattern on the kinetics as the ones generated by changes in the PB1 domain, highlighting that stable protein dimers ensure high-affinity DNA binding, no matter the source of their stability.

## Materials and Methods

**Protein expression and purification.** Protein expression and purification was carried out as described previously(17). Briefly, the genomic regions corresponding to the DNA binding domain (DBD) of *Arabidopsis thaliana* ARF1, ARF2, ARF5 and full-length ARF2 were amplified and cloned in an modified expression vector pTWIN1 (New England Biolabs) to generate fusions with the Chitin Binding Domain (CBD) and Intein. ARF-CBD fusion proteins were expressed in *E. coli* strain Rosetta DE3 (Novagen). Cells were inoculated in Difco Terrific Broth (BD), supplemented with ampicillin and grown to an OD<sub>600</sub> of 0.5 to 0.7, protein expression was induced by adding IPTG and the temperature was switched from 37 °C to 20 °C; the growth was continued for 20 h. Cells were harvested by centrifugation and resuspended in 50 mL extraction buffer (20 mM Tris, 500 mM NaCl, 1 mM EDTA, 0.1 % NP-40 and 2 mM MgCl<sub>2</sub>, pH 7.8, 10 mg of DNase and 0.2 mM PMSF). Cells were then lysed by passing the suspension twice through a French Pressure cell press and cell-free extract was generated by centrifugation. The supernatant was loaded onto a chitin column (New England Biolabs) and washed with 10 column volumes washing buffer (20 mM Tris, 500 mM NaCl, pH 7.8) using an AKTA explorer 100 (GE Healthcare). ARF-DBD proteins were eluted by 1 h incubation with 40 mM DTT in washing buffer. Proteins were concentrated using Amicon ultra-15 10K spin filters, and next passed over a Superdex 200PG size-exclusion chromatography column. ARF-DBD proteins were eluted using washing buffer with 1 mM DTT, concentrated using Amicon ultra-15 10K spin filters and stored until use at –80 °C.

**DNA constructs.** Single strand DNA oligonucleotides were ordered from Eurogentec. Each strand contained a 5-C6-amino-dT modification at the desired position for labelling. Some of the strands were purchased biotinylated at their 5'- end to allow for surface immobilization using a Neutravidin bridge. Strands were labelled with the desired dye (Cy3 or ATTO 647N NHS-ester) following a modified version of the protocol provided by the dye manufacturer and purified using polyacrylamide gel electrophoresis (20 % Acrylamide). DNA constructs were annealed by heating complementary single strands to 95 °C in annealing buffer (250 mM NaCl, 10 mM Tris HCl pH 8,

130 1 mM EDTA) followed by cooling down to room temperature  
131 overnight.

132 **Single-molecule FRET.** Imaging was carried out on a home-  
133 built TIRF microscope, described previously(25). The mea-  
134 surements were performed using alternating-laser excitation  
135 (ALEX)(26); in this excitation scheme, each frame during  
136 which the donor is excited is followed by a frame in which the  
137 acceptor is directly excited. The emission of the fluorophores  
138 is spectrally divided into two different detection channels on  
139 the emCCD camera sensor (Andor iXon 897 Ultra). This  
140 approach creates four photon streams, three of which are rel-  
141 evant; (1) donor emission after donor excitation ( $DD$ ), (2)  
142 acceptor emission after donor excitation ( $DA$ , arising from  
143 FRET) and (3) acceptor emission after acceptor excitation  
144 ( $AA$ ). The three photon streams can be used to calculate the  
145 raw FRET efficiency ( $E^* = DA/(DD + DA)$ ) and stoichiome-  
146 try ( $S = (DD + DA)/(DD + DA + AA)$ )(27).  $E^*$  contains the  
147 information about the relative distance of the two fluorophores  
148 whereas  $S$  contains information about the photophysical state  
149 of a given molecule (allowing to filter out molecules missing an  
150 active donor or an active acceptor). The camera acquisition  
151 time and the excitation time were set to 250 ms per frame;  
152 laser powers were set to 3 mW for green ( $\lambda = 561$  nm) and  
153 0.5 mW for red ( $\lambda = 638$  nm) lasers. The PBS-based imaging  
154 buffer (pH 7.4) contained 137 mM NaCl, 2.7 mM KCl, 10 mM  
155 phosphate, and 1 mM Trolox, 1 % gloxy and 1 % glucose to  
156 decrease the rate of photobleaching(28, 29).

157 **Single-molecule titration experiments.** Labelled dsDNA oligos  
158 were immobilized on a PEGylated glass coverslip as described  
159 previously(30). In particular, the PEGylation was carried  
160 out inside the wells of silicone gaskets placed on the coverslip  
161 (Grace Bio-labs). Each protein titration was performed using  
162 a single well, washing it between data points with 600  $\mu$ L of 1x  
163 PBS buffer. The final washing step consisted of three washings  
164 separated by 15 minutes. Typically, each data point consisted  
165 of four movies (1000 frames each).

166 **Binding isotherms analysis.** The fit of the FRET efficiency  
167 distribution with the two Gaussian distributions pertaining  
168 to the free and ARF-bound DNA populations returns an un-  
169 corrected fraction of ARF-bound DNA for each tested protein  
170 concentration  $i$ :  $F_B^u(i)$ . Even when no protein is added, the  
171 double Gaussian fit returns an uncorrected fraction bound  
172  $F_B^u(0) > 0$  (typically  $\approx 0.1$ ). This value is an indication of the  
173 error connected to the two-population fit and can be used to  
174 renormalize the entire titration under the assumption that,  
175 in case the DNA would be completely bound by ARF, the  
176 expected uncorrected free fraction would have the same value

( $F_B^u(0) = F_B^u(\infty)$ ). Then, the corrected fraction bound for  
each data point can be calculated as

$$F_B^c(i) = \frac{F_B^u(i) - F_B^u(0)}{1 - 2F_B^u(0)}. \quad [1]$$

The corrected fraction bound (henceforth  $F_B$ ) can be fitted  
with the appropriate mathematical model for the interaction.

**Time traces analysis.** First, the time traces from individual  
DNA molecules were filtered to remove sections in which either  
the donor or the acceptor were inactive due to fluorophore  
bleaching or blinking. Each molecule was allowed to take values  
of  $E^*$  and  $S$  outside the thresholds (typically 0 to 0.85 for  $E^*$   
and 0.5 to 0.9 for  $S$ ) for a maximum of three consecutive data  
points; longer stays outside the thresholding range resulted in  
the trace being interrupted. In case the molecule reentered the  
allowed range for  $E^*$  and  $S$ , the data points were saved as a new  
trace. The minimum length of traces was set to 50 data points  
(100 frames). The filtered time traces were then loaded in the  
software package ebFRET to perform an empirical Bayesian  
Hidden Markov Modelling(31). The analysis was performed  
assuming two states, with two restarts and a convergence  
threshold of  $10^{-6}$ . The results of the analysis were exported as  
'csv' text files and the transition matrix was used to calculate  
 $k_{on}$  and  $k_{off}$ . The  $K_d$  was calculated as  $k_{off}/k_{on}$ .

**SAXS.** Different concentrations of AtARF1 and AtARF5 rang-  
ing from 17  $\mu$ M to 170  $\mu$ M (0.7 mg mL $^{-1}$  to 7 mg mL $^{-1}$ ) were  
tested to record ARF dimerization depending on protein con-  
centration. All the samples were prepared in a final buffer  
consisting of 20 mM Tris-HCl pH 8.0, 150 mM NaCl, 1 mM  
DTT. SAXS data was collected at NCD-SWEET beamline  
(BL11, ALBA Synchrotron, Barcelona)(32, 33). The buffer was  
collected for subtraction of protein samples. Measurements  
were carried out at 293 K in a quartz capillary of 1.5 mm outer  
diameter and 0.01 mm wall thickness. The data (20 frames  
with an exposure time of 0.5 sec/frame) was recorded using  
a Pilatus 1M detector (Dectris, Switzerland) at a sample-  
detector distance of 2.56 m and a wavelength of 1.0  $\text{\AA}$ .

Buffer subtraction and extrapolation to infinite dilution were  
performed by using the program package primus/qt from the  
ATSAS 2.8.4 software suite(34). The forward scattering  $I(0)$   
and the radius of gyration ( $R_g$ ) were evaluated by the Guinier  
approximation, and the maximum distance  $D_{max}$  of the par-  
ticle was also computed from the entire scattering patterns  
with AutoGNOM. The excluded volume  $V_p$  of the particle  
was computed from the Porod invariant. The scattering from  
the crystallographic models was computed with CRY SOL(35).  
The volume fractions of the oligomers were determined with  
OLIGOMER(36), using as probe the available PDB structures.

## 223 Results

### 224 The AtARF2 PB1 domain promotes DNA binding through sta- 225 bilization of the AtARF2 dimer. A ChIP experiment on *Ara-*

226 *bidopsis Thaliana* ARF19 expressed in yeast(24) suggested  
227 that PB1 mutations affect DNA-binding affinity. However,  
228 other yeast proteins may confound the differences observed in  
229 this assay. We therefore focused on the minimal system of the  
230 purified ARF protein and its DNA target *in vitro* and asked  
231 whether the interactions between the PB1 domains modulate  
232 affinity of ARFs towards a composite AuxRE. We designed  
233 smFRET experiments in which the binding of ARFs to a small  
234 doubly labelled dsDNA oligo containing two AuxREs in an  
235 inverted configuration spaced by seven base pairs (IR7) leads  
236 to a decrease of FRET efficiency (Fig. 1a, Supporting Informa-  
237 tion Fig. S1). We then performed titrations with increasing  
238 concentrations of different ARF2 variants (Fig. 1b). The ARF  
239 DBD alone is sufficient for cooperative DNA binding to the  
240 IR7 element(17); to explore the influence of regions outside  
241 the DBD, we first compared binding of AtARF2-DBD and full-  
242 length AtARF2 (FL; DBD-MR-PB1). The FRET efficiency  
243 distributions of the DNA sensor show the free DNA population  
244 (93% occupancy) centered at  $E^* = 0.59$  in absence of ARF  
245 proteins. With increasing concentration of AtARF2-DBD  
246 or AtARF2-FL, the low FRET population representing the  
247 ARF-bound DNA fraction (centered at  $E^* = 0.42$ ) becomes  
248 progressively more populated.

249 To demonstrate that the shift seen during the titration is  
250 generated by specific binding of ARF to the DNA and that  
251 the binding is reversible, we performed a washing step at  
252 the end of each titration that reverted the FRET efficiency  
253 distributions to the ones seen in absence of ARF. When compar-  
254 ing AtARF2-DBD and AtARF2-FL, the FRET efficiency  
255 distributions clearly show the effect of the PB1 domain on  
256 the interaction between ARF2 and the IR7 response element;  
257 the shift between the response element being mostly free to  
258 mostly bound occurs at a protein concentration almost one  
259 order of magnitude lower with the full-length protein (256-  
260 512 nM ARF2-DBD vs 32-64 nM ARF2-FL). This finding is  
261 consistent with the PB1 domain promoting DNA binding.  
262 However, the full-length ARF protein also contains an extended  
263 MR region. To address the role of the PB1 domain specifically,  
264 we engineered mutations in the PB1 domain that  
265 prevent head-to tail interaction: AtARF2-FL K2S (K737S)  
266 and AtARF2-FL OPCA (D797-8S) carry mutations of amino  
267 acids on the positive (K2S) and negative (OPCA) side of  
268 the PB1 domain respectively, both of which were shown to  
269 impair the interaction between PB1 domains(6). In both mutant  
270 ARF2 versions, we see equal percentages of DNA bound  
271 and free at concentrations close to the ones of ARF2-DBD

(64-128 nM K2S and 128-256 nM OPCA). Thus, PB1 domain  
272 interactions contribute to efficient DNA binding. PB1 domains  
273 could potentially oligomerize through head-to-tail interactions.  
274 To address if oligomerization stabilizes DNA binding, we compar-  
275 ed a mixture of ARF2-FL K2S and ARF2-FL-OPCA in a  
276 1:1 ratio (henceforth ARF2 FL KpO) with the wildtype version  
277 (ARF2-FL). While the latter allows for oligomerization, the  
278 former should only be able to dimerize. Both ARF2 FL KpO  
279 and ARF2-FL show high affinity towards the IR7 (32-64 nM).  
280 Taken together, these observations indicate that the PB1 do-  
281 main stabilizes the binding of ARF2 towards an IR7 response  
282 element through stabilization of the protein dimer.  
283

### 284 A four-state cyclic model for describing ARF-DNA interactions. One

285 way of quantifying the effect of the PB1 domain on the affinity  
286 between ARF and its RE is to fit the increase of the fraction  
287 of DNA bound to ARF as the concentration of protein in-  
288 creases, with a single apparent  $K_d^*$ . This approach can reliably  
289 summarize the strength of the interaction providing a single  
290 numerical value that exemplifies at which endogenous protein  
291 concentration the interaction becomes relevant(22, 37), but  
292 fails to properly describe the underlying system, which results  
293 in a lack of predictive power.

294 The interaction between a protein that can dimerize and a  
295 bipartite response element on the DNA can be described using  
296 a four-state cyclic model. This model allows for monomers  
297 or dimers to bind the DNA, for monomers and dimers to  
298 exist in solution and for dimers to form or dissociate both  
299 in solution or on the DNA. Figure 1c depicts the model for  
300 ARF2-FL KpO; the two ARF2-FL variants are characterized  
301 by the same DBD (red) and MR (black) but are mutated on  
302 the two opposite surfaces of the PB1 domain (K2S and OPCA  
303 mutants in orange and green respectively); this allows for the  
304 formation of PB1 domain dimers but hinders the formation  
305 of oligomers. The system is defined by four  $k_{onS}$  and four  
306  $k_{offS}$  or alternatively by four equilibrium constants ( $K$ s). The  
307 presence of the PB1 domain should not change the contacting  
308 interface between the DBDs and the DNA; hence, the  $k_{off}$  of  
309 the dimer from the DNA ( $k_{off,DF}$ ) should have the same value  
310 for all AtARF2-variants; the same holds for the  $k_{off}$  of the  
311 monomer from the DNA ( $k_{off,MF}$ ). Moreover, the PB1 domain  
312 has limited influence on the  $k_{onS}$  of the system which stay  
313 diffusion limited. The only constants that are expected to be  
314 influenced by changes in the stability of the dimer induced by  
315 the PB1 domain are the ones associated with the separation  
316 of two monomers: the equilibrium dissociation constant of the  
317 dimer in solution ( $K_I = k_{off,DS}/k_{on,DS}$ ) and  $k_{off,DM}$ , which  
318 encompasses the stability of the dimer on the DNA. As the  
319 model is a closed cycle, microscopic reversibility(38) implies  
320 that only one of these two parameters is a free parameter; then,

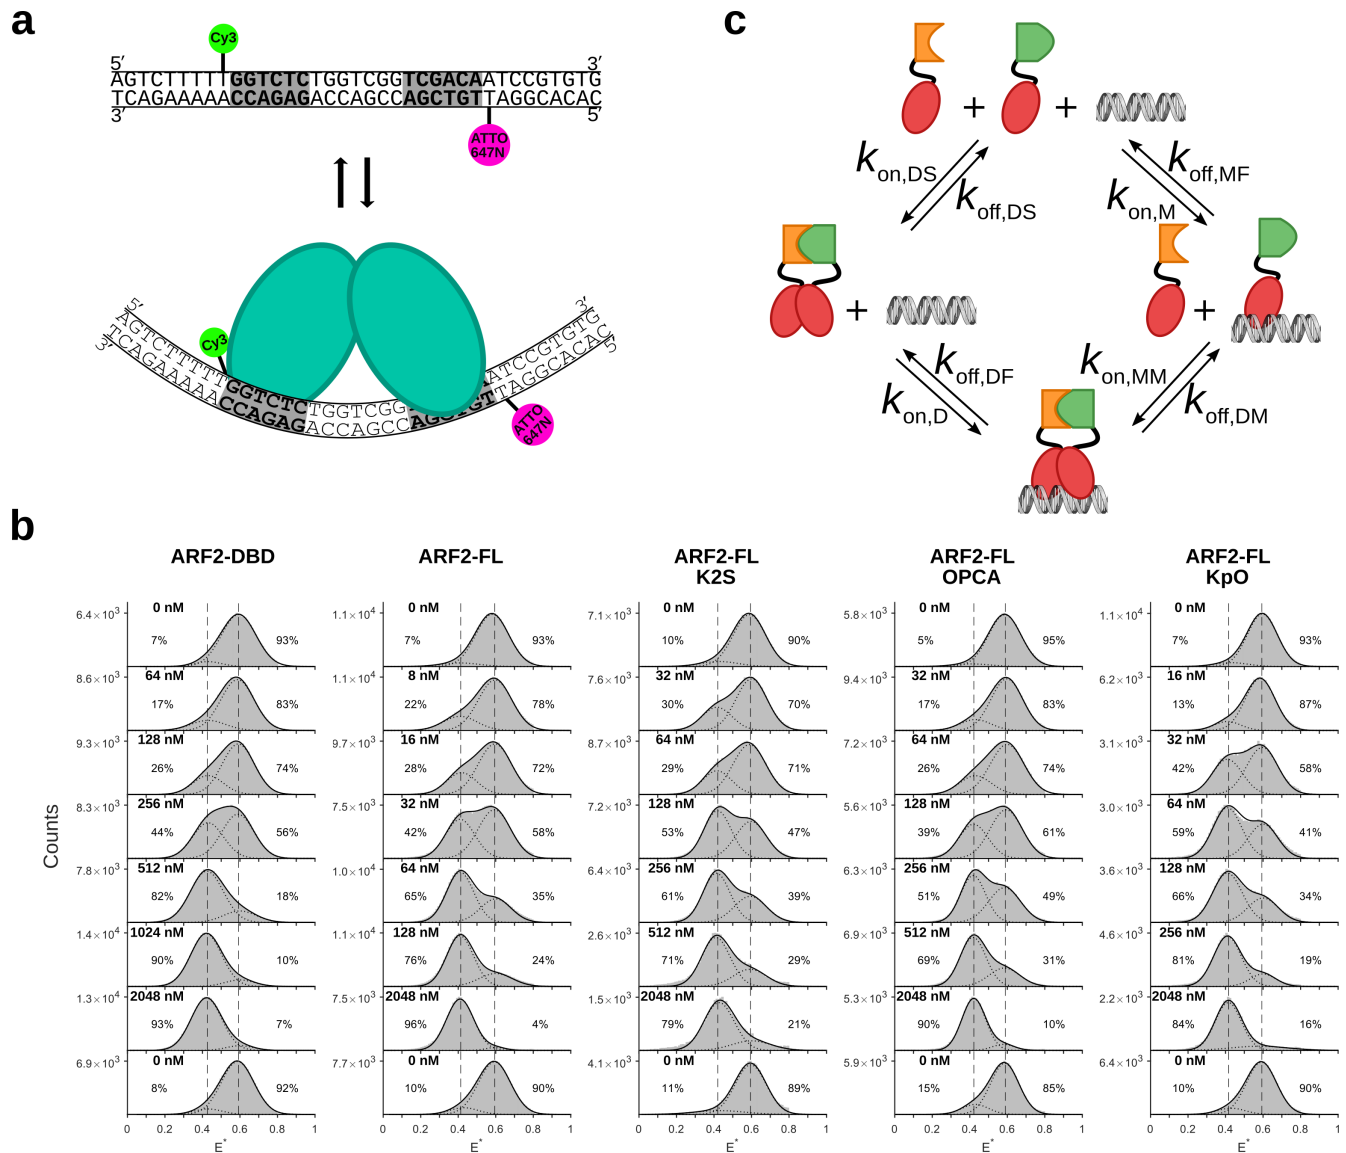

**Fig. 1.** SmFRET binding assay and cyclic four-state model. (a) Schematic representation of the DNA-binding assay used to evaluate ARF binding; the dsDNA is labelled with Cy3 and Atto647N on the opposite sides of the response element (RE). Upon protein binding, the increased distance between the dyes leads to a decrease in FRET efficiency. (b) Titrations of the dsDNA with several ARF variants. The dsDNA alone has a FRET efficiency  $E^* = 0.59$ ; as the protein concentration increases the population of bound DNA (centered at  $E^* = 0.42$ ) increases until all the DNA is bound (saturating condition). A washing step suffices to reset the system proving that the bound population is generated by specific and reversible binding of ARF. Vertical dashed lines are added for visual guidance. (c) Schematic representation of the four-state cyclic model for ARF2-FL KpO-IR7. Note that the dsDNA containing the DNA response element can be found in three states: free (F), bound to a monomer (M) and bound to a dimer (D). The two ARF2 full length variants (K2S and OPCA) have the same DBD (in red) and MR domains (in black) but their PB1 domain (in orange and green, respectively) carry a mutation on either one of the two different surfaces; this hinders oligomerization but allows dimerization. The binding of a dimer to a bipartite response element can occur either through two successive binding events of a monomer or through direct binding of a dimer formed in solution. The dissociation can occur either by the loss of a monomer followed by the dissociation of the second monomer from the DNA or by direct dissociation of a dimer from the DNA.

321 the different variants tested are characterized in this model by  
322 the single variant-specific parameter  $K_I$ , which encompasses  
323 the stability of the ARF dimer. Fitting experimental results to  
324 determine  $K_I$  and the other relevant shared kinetic constants  
325 provides a deeper understanding of the system allowing to  
326 make prediction for other ARF-AuxRE interactions.

327 **ARF-IR7 interaction follows a four-state cyclic interaction**  
328 **mechanism.** To obtain the kinetics of AtARF2/IR7 interaction,  
329 we analyzed relevant datapoints of the titrations for the series  
330 of variants using ebFRET(31), a MATLAB suite for Hidden  
331 Markov Model (HMM) analysis of single-molecule time traces  
332 (see Materials and Methods). As the DNA oligonucleotides are  
333 immobilized, their interaction with the proteins in solution can  
334 be monitored for several minutes (250 s in our experiments).  
335 The analyzed FRET traces returned the most probable hidden  
336 state sequence for each trace (Fig. 2a) according to the set  
337 of kinetic parameters that best explains the transitions and  
338 states seen in the entire dataset.

339 To facilitate the identification of transitions by ebFRET, we  
340 selected three concentrations of ARF ( $[ARF]_T$ ) that returned  
341 close to equal populations of ARF-bound and free DNA for  
342 each AtARF2 variant. Each AtARF2 variant was tested in at  
343 least three independent titrations; each datapoint of each titra-  
344 tion was analyzed independently using ebFRET and returned  
345 a value for  $k_{on}$ , a value for  $k_{off}$  and, from their ratio, a value  
346 for  $K_d$  (Fig. 2b, colored markers). The observed  $k_{on}$  show a  
347 trend in which ARF variants with higher affinity show faster  
348 association. On the other hand, the  $k_{off}$  show similar values for  
349 all the FL variants whilst AtARF2-DBD has a faster  $k_{off}$ . The  
350 resulting  $K_d$ s show the expected trend, with AtARF2-DBD  
351 having the lowest affinity, AtARF2-FL KpO and wt showing  
352 the tightest binding and AtARF2-FL K2S and OPCA having  
353 an affinity in between these. The trends seen in the  $k_{on}$  and  
354  $k_{off}$  suggest that the analysis of the kinetics using HMM is  
355 capturing the interaction between the ARF dimer and the  
356 DNA and that the interaction between the ARF monomer  
357 and the DNA occurs on a timescale shorter than the 500 ms  
358 acquisition time used in our experiments.

359 For a four-states cyclic model the binding isotherms (Fig. 2c,  
360 colored markers) and observed kinetic constants (Fig. 2b, col-  
361 ored markers) can be fitted with a system of equations con-  
362 taining a set of three parameters shared across all AtARF2  
363 variants ( $k_{on,mic}$ ,  $k_{off,DF}$  and  $k_{off,MF}$ ) and the variant-specific  
364 parameter  $K_I$  (see supporting note 1 and 2). Here,  $k_{on,mic}$  is  
365 the microscopic  $k_{on}$  that a monomer displays when binding a  
366 single AuxRE and hence it is equal to  $k_{on,MM}$  but it is half  
367 the value of  $k_{on,M}$  and  $k_{on,D}$ . The global fit (Fig. 2b-c, colored  
368 lines) returned the values of  $k_{on,mic}$ ,  $k_{off,DF}$ ,  $k_{off,MF}$  and  $K_I$ s  
369 that best explain the experimental data (see Table 1). The

370 global fit converged to a  $K_I$  of 0 nM for AtARF2-FL wt; in this  
371 situation the equation of the fraction bound for the four-states  
372 system simplifies to a simple binding isotherm for the dimer  
373 (see supporting note 1). On the other binding isotherms, the  
374 fit captured the shift of the binding to higher  $[ARF]_T$  thanks  
375 to increasing values of  $K_I$ , which corresponds to a decrease in  
376 dimer stability (Fig. 2c). The fit of the binding isotherm of  
377 AtARF2FL KpO is still very close to the one of AtARF2FL wt  
378 but because of the decrease in dimer stability ( $K_I = 0.016 \mu\text{M}$ )  
379 its steepness is increased. The two AtARF2-FL mutants, K2S  
380 and OPCA, show similar values of  $K_I$  (0.23  $\mu\text{M}$  and 0.41  $\mu\text{M}$   
381 respectively). Lastly, the fit returned a value of  $K_I$  of 1.9  $\mu\text{M}$   
382 for AtARF2-DBD.

383 Looking at the observed binding kinetics, the global fit cap-  
384 tures the trends of the observed  $k_{on}$  and  $k_{off}$  (Fig. 2b). Here,  
385 AtARF2 variants with higher dimer stability display higher  
386 values of observed  $k_{on}$  as their lower  $K_I$  increases the effec-  
387 tive concentration of ARF dimer in solution. The fits for the  
388 observed  $k_{off}$  of AtARF2-FL wt and KpO converge to the  
389 value of the dissociation kinetic of the dimer from the DNA  
390 ( $k_{off,DF} = 0.026 \text{ s}^{-1}$ ). For the other datasets (AtARF2-FL  
391 K2S, AtARF2-FL OPCA and AtARF2-DBD) the dissociation  
392 of the dimer from the DNA caused by the loss of a monomer  
393 plays a role and becomes almost as likely as the dissociation  
394 of the dimer from the DNA in the case of AtARF2-DBD  
395 ( $k_{off,DM} = 0.016 \text{ s}^{-1}$ ).

396 The kinetic and equilibrium constants obtained from the global  
397 fit show that the monomer is the predominant species in  
398 solution for most of AtARF2 variants and for most of the  
399 tested concentration range (Fig. 2d top, solid lines). Strikingly,  
400 the fraction of DNA bound by a monomer never exceeds  
401 10 % (Fig. 2d top, dashed lines). The complex consisting of  
402 the AtARF2 dimer bound to the DNA can split by either  
403 a monomer or the dimer dissociating from the DNA. Our  
404 results show that the dissociation of the dimer from the DNA  
405 is the route used by AtARF2-FL and AtARF2-FL KpO, while  
406 the dissociation from the DNA through loss of a monomer  
407 becomes viable for AtARF2-FL K2S and OPCA and accounts  
408 for approximately 40 % of the splitting events in the case  
409 AtARF2-DBD (Fig. 2d bottom).

#### 410 **Dimer stability determines the binding kinetics of ARF-DBDs.**

411 We showed that AtARF2 dimer stability induced by the pres-  
412 ence of the PB1 domain influences the kinetics of the binding  
413 of ARF towards its DNA response element. We next asked  
414 whether dimer stability is a more generic parameter defin-  
415 ing DNA binding affinity across the ARF protein family. To  
416 this end, we purified the DNA-binding domains of two other  
417 ARFs (class B AtARF1-DBD, class A AtARF5-DBD) and two  
418 mutant versions (AtARF5-DBD G279N and AtARF5-DBD

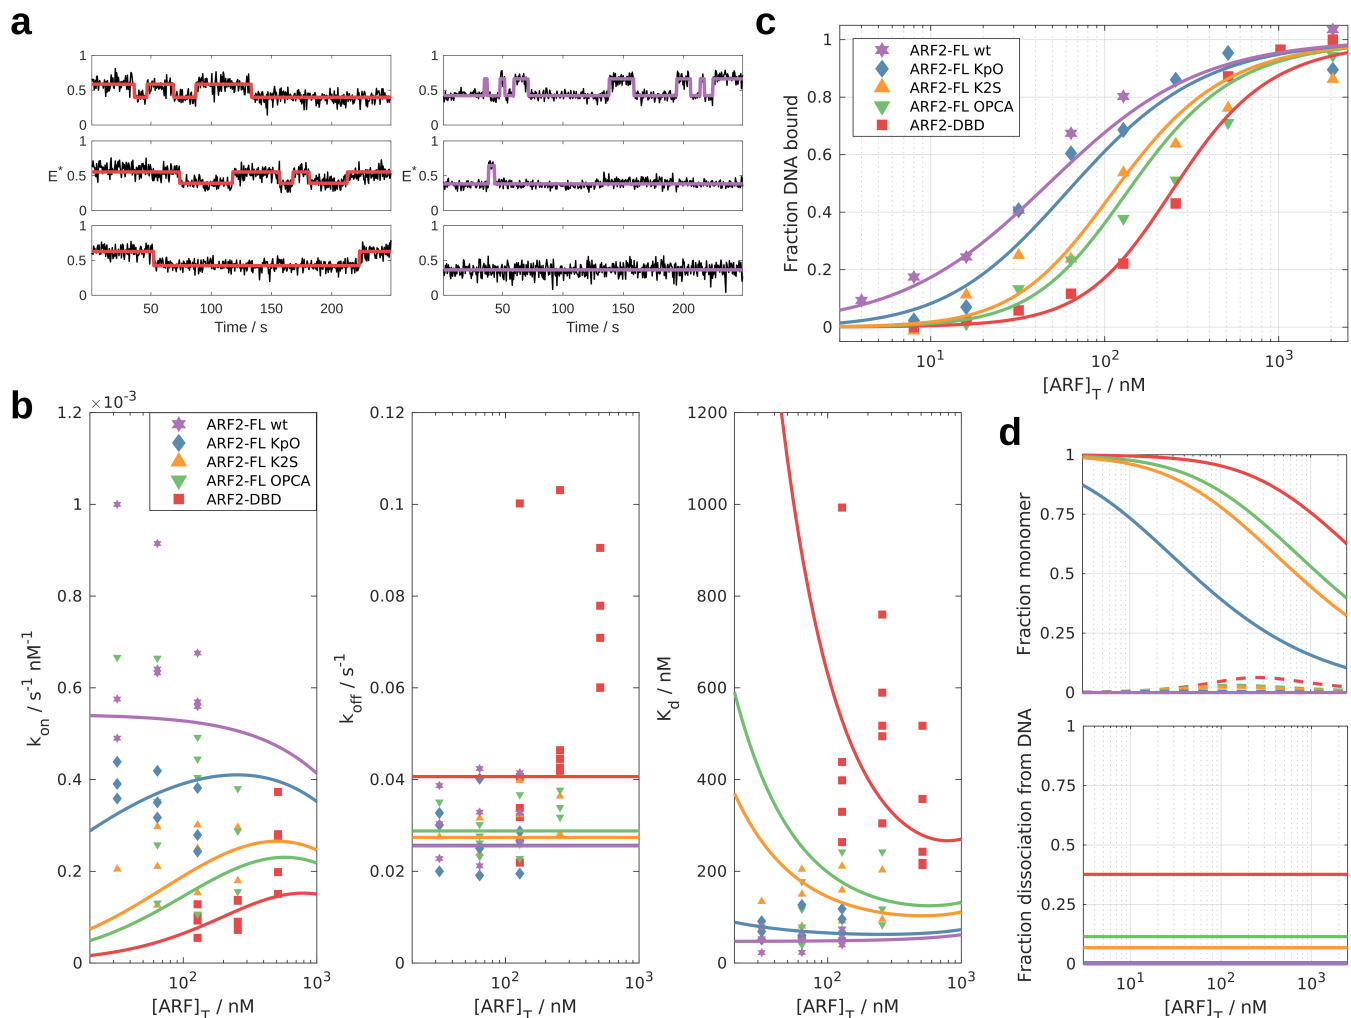

**Fig. 2.** AtARF2-IR7 interaction follows a four-state cyclic interaction mechanism. (a) Example of FRET efficiency time traces of single doubly labelled dsDNA in presence of 128 nM of either AtARF2-DBD (left) or AtARF2-FL wt (right). The FRET efficiency is reported in black and the most probable sequence of hidden states returned by ebFRET is represented in red (AtARF2-DBD) and purple (AtARF2-FL wt). (b) Kinetics parameters obtained from ebFRET. For each ARF variant three concentrations closest to having half of the DNA bound to ARF were measured in at least three independent titrations. Each repeat of each concentration is analyzed independently using ebFRET obtaining a value of observed  $k_{on}$  and  $k_{off}$  (and, from their ratio the  $K_d$ ) and plotted using colored markers. (c) Fraction of DNA bound by ARF as function of ARF concentration (binding isotherm). The fractions bound were obtained from the histograms and plotted using colored markers (Fig. 1b, Materials and Methods). (b-c) The result of the global fit of the kinetics of binding and the fraction of DNA bound is reported as colored lines. (d) Features of the four states system as solved by the global fit. Top: In solution, the monomer is the most abundant species (solid lines). On the DNA, the monomer accounts for less than 10 % of the bound DNA (dashed lines). Bottom: Fraction dissociation of the AtARF2 dimer from the DNA via loss of an AtARF2 monomer. The dissociation of the AtARF2 dimer from the DNA can occur either via its direct unbinding from the DNA or by initial loss of an AtARF2 monomer. Direct unbinding of the dimer is the predominant route for all AtARF2 variants but the fraction of dissociations happening via an initial loss of a monomer accounts for almost 40 % of the events in case of AtARF2-DBD.

| Protein        | $k_{on,mic}$<br>[nM <sup>-1</sup> s <sup>-1</sup> ] | $k_{off,MF}$<br>[s <sup>-1</sup> ] | $k_{off,DF}$<br>[s <sup>-1</sup> ] | $K_d$<br>[μM]                     |
|----------------|-----------------------------------------------------|------------------------------------|------------------------------------|-----------------------------------|
| AtARF2-DBD     |                                                     |                                    |                                    | 1.9 [0.9:2.9] × 10 <sup>0</sup>   |
| AtARF2-FL OPCA |                                                     |                                    |                                    | 4.1 [1.0:7.1] × 10 <sup>-1</sup>  |
| AtARF2-FL K2S  | 5.4 [3.6:7.3] × 10 <sup>-4</sup>                    | 1.7 [0.6:2.8]                      | 2.6 [2.2:2.9] × 10 <sup>-2</sup>   | 2.3 [0.4:4.2] × 10 <sup>-1</sup>  |
| AtARF2-FL KpO  |                                                     |                                    |                                    | 1.6 [-1.5:4.7] × 10 <sup>-2</sup> |
| AtARF2-FL wt   |                                                     |                                    |                                    | 0.0 [-0.4:0.4] × 10 <sup>-6</sup> |

**Table 1. Global fit: values and uncertainty of the fitting parameters reported as mean [95 % CI]**

419 R215A) and quantified their DNA binding affinity.

420 Experiments with AtARF1-DBD showed similar values  
421 of  $k_{on}$  and  $k_{off}$  ( $1.3 \times 10^{-4}$  nM<sup>-1</sup>s<sup>-1</sup> 95 % CI [0.8:1.8],  
422  $0.080$  s<sup>-1</sup> 95 % CI [0.062:0.098], respectively) as AtARF2-  
423 DBD ( $1.1 \times 10^{-4}$  nM<sup>-1</sup>s<sup>-1</sup> 95 % CI [0.7:1.4],  $0.066$  s<sup>-1</sup> 95 %  
424 CI [0.045:0.087], respectively; Fig. 3). On the other  
425 hand, AtARF5-DBD showed a 5-fold increase in  $k_{on}$   
426 ( $5.9 \times 10^{-4}$  nM<sup>-1</sup>s<sup>-1</sup> 95 % CI [2.3:9.4]) and an 8-fold reduc-  
427 tion in  $k_{off}$  ( $0.0085$  s<sup>-1</sup> 95 % CI [0.0051:0.0118]) compared to  
428 AtARF2-DBD; which lead to a  $K_d$  of 15 nM (95 % CI [12:18]).  
429 In analogy with the considerations made for AtARF2-FL, the  
430 increase in  $k_{on}$  and part of the decrease in  $k_{off}$  can be explained  
431 with AtARF5-DBDs forming a tighter protein dimer compared  
432 to AtARF1 and AtARF2 DBDs.

433 To test this hypothesis directly, we tested AtARF5-DBD  
434 G279N, a single amino acid mutation known to reduce  
435 AtARF5-DBD dimerization(17). Strikingly, the kinetics  
436 of the interaction between AtARF5-DBD G279N and the  
437 IR7 became similar to the ones of AtARF1 and AtARF2  
438 DBDs ( $1.2 \times 10^{-4}$  nM<sup>-1</sup>s<sup>-1</sup> 95 % CI [1.0:1.5],  $0.10$  s<sup>-1</sup> 95 %  
439 CI [0.04:0.17]) validating our hypothesis. Finally, we tested  
440 AtARF5-DBD R215A, a mutant in which a key amino acid for  
441 the interaction with the DNA is mutated(17). This mutant  
442 showed a 13-fold reduction of  $k_{on}$  compared to the wild-type  
443 ( $0.46 \times 10^{-4}$  nM<sup>-1</sup>s<sup>-1</sup> 95 % CI [0.41:0.51]) as well as a 39-fold  
444 increase of  $k_{off}$  ( $0.33$  s<sup>-1</sup> 95 % CI [0.14:0.52]) which translates  
445 in a reduction of affinity of three orders of magnitude. We  
446 note that the magnitude of the reduction of  $k_{on}$  is consistent  
447 with the effect of charge neutralization of DNA-contacting  
448 residues seen in other protein-DNA interactions(39) and is a  
449 reminder of the importance of charged residues in defining  
450 association kinetics (40, 41).

451 To directly measure ARF dimer stability, we measured SAXS  
452 (Small-angle X-ray scattering) intensity profiles of AtARF5-  
453 DBD and AtARF1-DBD (Fig. 4). The difference in dimer  
454 stability is clear with AtARF5-DBD exhibiting higher dimer

455 prevalence at all tested concentration. The results on AtARF5-  
456 DBD are consistent with a dimerization  $K_d$  in the order of  
457 the tenth of μM while for AtARF1-DBD the  $K_d$  is in the  
458 order of few μM. These results confirm the expectation set by  
459 the analysis of the binding kinetics that AtARF5-DBD forms  
460 relatively stable dimers even in absence of the PB1 domain.

## 461 Discussion

462 The ARF PB1 domain mediates the binding of Aux/IAA to  
463 ARFs, allowing for inhibition of ARF activity(3–5). In ARFs  
464 from Arabidopsis, deleting or mutating the PB1 domain leads  
465 to hyperactive ARFs(23), consistent with a role in suppressing  
466 activity. In contrast, the Marchantia ARF1 PB1 domain is  
467 required for function, a deletion of this domain renders the pro-  
468 tein inactive(22). Given that the minimal set of ARF proteins  
469 found in Marchantia qualifies these as likely representatives of  
470 ancestral protein functions(42), an open question is what the  
471 actual roles of ARF PB1 domains are. Here, we explored the  
472 role of this domain in modulating the DNA binding affinity of  
473 AtARF2 towards an IR7 response element. We found that full-  
474 length ARF2 protein has a strongly increased DNA-binding  
475 affinity, which can be ascribed to interactions between the  
476 PB1 domains. Interestingly, our results show that oligomer-  
477 ization does not further enhance the affinity towards bipartite  
478 response elements. This behaviour is consistent with the fact  
479 that additional ARF monomers (beside the initial two) do  
480 not have any AuxRE left to further stabilize the binding to  
481 the DNA. This said, the effect of the PB1 domain seen in our  
482 experiments predicts that oligomerization should be relevant  
483 on response elements comprising of more than two AuxREs  
484 as the PB1 domain would enable cooperative binding beyond  
485 the dimer. Given the short consensus sequence in AuxRE  
486 motifs, these may occur in close proximity in promoters, in  
487 which case oligomerization could generate additional cooper-  
488 ativity of ARF-DNA interaction. Regardless, the use of a  
489 C-terminal head-to tail oligomerization domain (with two in-



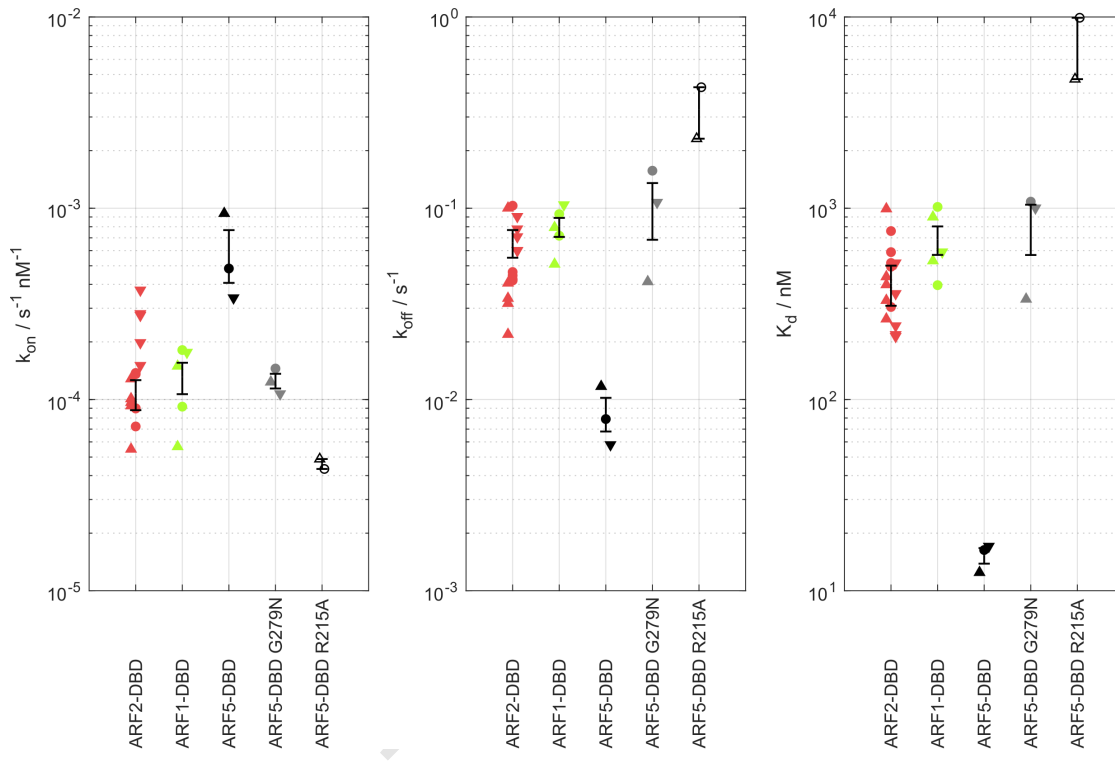

**Fig. 3.** Kinetics of the interaction between AtARF-DBDs and IR7. Kinetic parameters obtained from HMM analysis using ebFRET. The datapoints are marked with  $\Delta$ ,  $\square$  and  $\nabla$  in order of increasing ARF concentration. The ARF concentrations were 128, 256, 512 nM for AtARF2-DBD and AtARF1-DBD, 8, 16 and 32 nM for AtARF5-DBD, 64, 128 and 256 nM for AtARF5-DBD G279N and 128 and 512 nM for AtARF5-DBD R215A. The error bars represent the standard deviations of the mean values. AtARF2-DBD and AtARF1-DBD behaved similarly while AtARF5-DBD showed increased  $k_{on}$  and decreased  $k_{off}$ . Consistent with a model in which part of the difference in kinetic can be explained by an increased stability of AtARF5-DBD dimer. A weakening of AtARF5-DBD dimerisation (G279N mutant) leads to kinetic parameters that resemble the ones of AtARF1-DBD and AtARF2-DBD. In addition, AtARF5-DBD R215A mutant in a key amino acid for the interaction with DNA showed a  $k_{on}$  reduced by one order of magnitude and a  $k_{off}$  increased by almost two orders of magnitude compared to the wild-type.

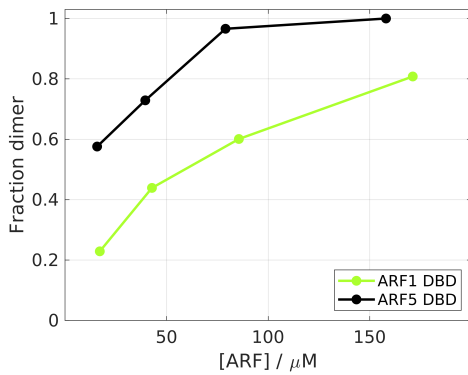

**Fig. 4.** Fraction of dimer measured using SAXS. The stability of the dimer of AtARF5-DBD is higher than the one of AtARF1-DBD for all tested concentration.

dimer of AtARF2 is  $\approx 60$  times more stable when bound to the DNA compared to being in solution.

The analysis of the kinetics of the interaction between different ARF DBDs and the IR7-RE suggests that the tighter binding of AtARF5-DBD compared to AtARF1 and AtARF2 DBDs is in part due to the higher stability of its dimer. This prediction is further corroborated by SAXS data showing that AtARF5-DBD forms more stable dimers in solution compared to AtARF1-DBD. The stable DNA binding that AtARF5-DBD achieve even in absence of the PB1 domain could explain why AtARF5PB1 is a gain-of-function mutant that can activate auxin-responsive genes even in absence of auxin(23). Then, the role of the PB1 domain of AtARF5 appears to be mainly to bind the PB1 domain of Aux/IAs coupling the transcriptional output of ARF with the presence of auxin. This hypothesis is confirmed by the fact that the PB1 domain of AtARF5 has a homodimerization  $K_d$  of 870 nM but an heterodimerization  $K_d$  with the PB1 domain of Aux/IAA17 of 73 nM(8). Moreover, AtARF5 and other A-class ARFs have been found to interact with many different Aux/IAA in a series of protein-protein interaction assays(24, 43–53). A different scenario is seen in case of AtARF2 (a class B ARF), where our data suggest that the interaction between PB1 of different AtARF2 monomers might be required to achieve the stable DNA binding that enables protein function. This behavior of the PB1 domain might be a common feature of other class B/C ARFs and could explain why this class of ARFs has been seen to interact with fewer members of the Aux/IAA family(43, 51–54).

The picture emerging is that the PB1 domain has different functions in the two main ARF classes in *A. thaliana*. In class A ARFs, it serves as a mediator of auxin-responsiveness whereas it stabilizes the DNA binding in class B (and perhaps C) ARFs. This model of action for the PB1 domain is similar to the one found in *M. polymorpha* as part of the recently published minimal auxin response system(22) with one key difference: MpARF1 (the only class A ARF in this species) cannot function without its PB1 domain. Therefore, the PB1 domain of class A ARFs in *M. polymorpha* probably has the double function of stabilizing the binding to the DNA and interacting with MpAux/IAA. This double function opens the possibility of a double repression by Aux/IAA, where, in addition to the recruitment of the co-repressor TOPLESS(55) (TPL), a destabilization of ARF-DNA interaction might also play a role.

Binding of ARF to bipartite AuxREs in the other two possible orientations (directed repeat DR and everted repeat ER), should resemble the one seen for the IR with the difference that the dimerization through the DBD domain should not

490 teraction faces) can be considered an efficient means of flexible  
491 interaction.

492 By simultaneously fitting affinity and kinetic data with the  
493 analytical solution of a four-state cyclic model, we showed that  
494 the increase of ARF DNA binding affinity can be completely  
495 attributed to a shift in the dimer/monomer equilibrium of  
496 ARFs. It follows that the effect of the PB1 domain on ARFs  
497 affinity towards an IR7 response element is to shift the dimer-  
498 ization equilibrium towards the dimer. Strikingly, the fit allows  
499 to obtain quantitative information about the protein dimer-  
500 ization  $K_d$  in solution (i.e.,  $K_I$ ) although the protein was not  
501 directly observed in the experiment.

502 The kinetic parameters for AtARF2-DBD show that DNA  
503 binding and unbinding is almost equally probable to happen  
504 through a monomer-bound DNA intermediate or through di-  
505 rect binding of the dimer (Fig. 5). Moreover, the monomer  
506 is the most common species in solution even at ARF concen-  
507 trations that saturate the DNA (i.e., DNA fully bound by an  
508 ARF dimer); despite this, the percentage of DNA bound by  
509 an ARF monomer never exceeds 10% as this intermediate is  
510 short lived and quickly proceeds to either forming a dimer or  
511 dissociate.

512 The kinetics of AtARF2-FL KpO-IR7 interaction is remarkably  
513 different (Fig. 5); here, the association between the DNA and  
514 a dimer follows almost exclusively the pathway where the ARF  
515 dimer is formed in solution. Moreover, the unbinding of a  
516 single monomer from a dimer bound to the DNA is unlikely  
517 ( $K_d < 1$  nM).

518 In general, the importance of dimerization for stable DNA  
519 binding clearly emerges from our analysis as a reminder of  
520 the importance of cooperativity in protein-DNA interaction.  
521 Moreover, cooperativity is symmetric: a protein that can  
522 dimerize on a bipartite response element will bind it with  
523 higher affinity but also a bipartite element will stabilize the  
524 dimer of the protein that is bound to it. In particular, the

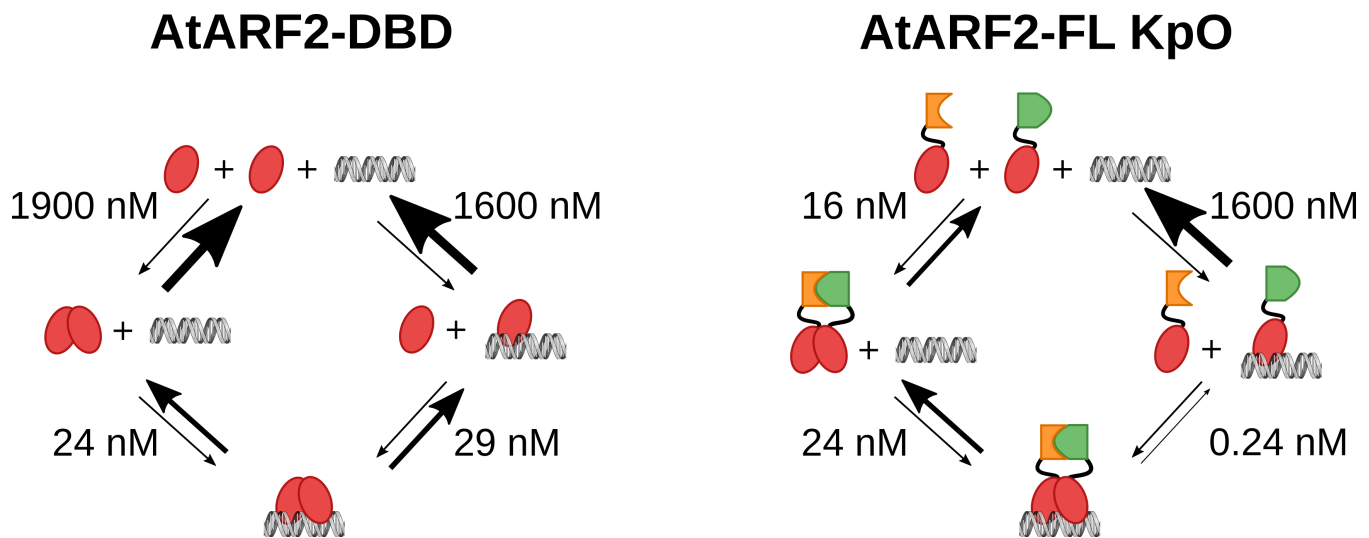

**Fig. 5.** Dissociation constants for the four-state cyclic model as determined from the fit in figure 2. ARF2-DBD binds the DNA via dimerization on the DNA and dimerization in solution with similar probability. ARF2-FL KpO mostly dimerizes in solution and then binds the DNA. The presence of the PB1 domain reduces all Kds making all interactions more stable (aside from the monomer-DNA interaction). This results in the higher affinity of ARF towards the RE when the PB1 domain is present.

574 be possible. In this scenario the analytical solution of the  
 575 4-state model for ARF-DBDs simplifies to a binding isotherm  
 576 for independent binding of the monomers characterized by low  
 577 steepness (no cooperativity, see also supporting Note 1). Strik-  
 578 ingly, titrations presented in a recent publication(37) confirmed  
 579 this prediction; the binding of AtARF1-DBD and AtARF5-  
 580 DBD to a bipartite DR5 was compatible with a simple binding  
 581 isotherm, whereas binding to an IR8 showed steeper response,  
 582 similar to the one seen here for AtARF2-DBD. Since stable  
 583 DNA binding arises from stable dimerization/oligomerization,  
 584 the topology of composite AuxREs dictates the affinity to-  
 585 wards distinct ARF members differentiating them based on the  
 586 relative strength of the homotypic interaction through their  
 587 DBD and PB1 domains. Tweaking the affinities of different  
 588 ARFs towards the same DNA sequence can be achieved by af-  
 589 fecting their dimerization properties and opens the possibility  
 590 for an evolutionary pathway of complex interactions between  
 591 members of the family.

592 Lastly, it is interesting to speculate on the biological signifi-  
 593 cance of the dual, cooperative dimerization mode we identified  
 594 here. Effectively, the double-check mechanism would favor  
 595 dimerization of ARFs, when bound on DNA. ARF monomers  
 596 have limited sequence specificity of DNA binding. In the  
 597 hexanucleotide binding site, only 2 nucleotides are invariant,  
 598 and four are conserved(17, 19, 56). Thus, one would expect  
 599 a monomer to find binding sites frequently in the genome.  
 600 Dimerization adds two constraints that dramatically increase  
 601 specificity: a second, symmetric DNA element as well as a  
 602 fixed optimal space between the elements. This strongly limits  
 603 the probability of a random occurrence of the response element  
 604 and explains why dimerization is such a common features of

transcription factors across all domains of life(57, 58). Unfor- 605  
 606 tunately, probing genome-wide ARF binding has been chal-  
 607 lenging, and no comparisons between monomers and dimers  
 608 have yet been made. However, ARF2 and ARF5 have both  
 609 been used in DAP-seq binding site mapping on the Arabidop-  
 610 sis genome(19). If dimerization limits the number of genomic  
 611 binding sites, one would predict that ARF5 – with a higher  
 612 propensity to dimerize (as shown here) binds fewer sites. This  
 613 is exactly what was found: ARF2 appears more promiscuous  
 614 in its binding profile(19, 56). A hypothesis, to be tested in the  
 615 future, is therefore that dimerization is the primary mechanism  
 616 for defining ARF-DNA binding specificity in vivo.

### 617 Authors' Contributions

618 The project was initiated and supervised by Dolf Weijers  
 619 (D.W.) and Johannes Hohlbein (J.H.). Mattia Fontana (M.F.)  
 620 developed the methodology, defined the experimental design,  
 621 wrote and adapted the software for data analysis. Mark Roos-  
 622 jen and Willy van den Berg purified the proteins. M.F. per-  
 623 formed smFRET experiments, analyzed the data, derived the  
 624 analytical solutions for the system and implemented the global  
 625 fit. Isidro Crespo García performed SAXS experiments and  
 626 data analysis, supported by Marc Malfois and under super-  
 627 vision by Roeland Boer. M.F., J.H. and D.W discussed the  
 628 content of the manuscript. M.F. wrote the draft manuscript  
 629 and produced the figures. All authors provided feedback on  
 630 the draft.

### 631 Competing Interests

632 None to declare.

## 633 Funding Statement

634 This work was supported by a PhD fellowship (M.F.) from  
635 the Graduate School Experimental Plant Sciences to J.H.  
636 and D.W., the Ministry of Economy and Competitiveness  
637 of the Spanish Government grants PID2020-117028 GB-I00  
638 (AEI/FEDER, EU), BIO2016-77883-C2-2-P (AEI/FEDER,  
639 EU) and FIS2015-72574-EXP (AEI/FEDER, EU) to R.B.  
640 and a VICI grant (no. 865.14.001) from the Netherlands  
641 Organization for Scientific Research (NWO) to D.W.

## 642 Data availability

643 The experimental data is available on Zenodo:  
644 <https://doi.org/10.5281/zenodo.7249508>.

## 645 Acknowledgements

646 We would like to thank all our colleagues at the Laboratory  
647 of Biophysics and the Laboratory of Biochemistry for helpful  
648 discussions.

- 649 1. P Grones, J Friml, Auxin transporters and binding proteins at a glance. *J. Cell. Sci.* **128**, 1–7  
650 (2015).
- 651 2. M Lavy, M Estelle, Mechanisms of auxin signaling. *Development* **143**, 3226–3229 (2016).
- 652 3. D Weijers, D Wagner, Transcriptional responses to the auxin hormone. *Annu. Rev. Plant Biol.*  
653 **67**, 539–574 (2016).
- 654 4. F Parcy, T Vernoux, R Dumas, A glimpse beyond structures in auxin-dependent transcription.  
655 *Trends Plant Sci.* **21**, 574–583 (2016).
- 656 5. M Roosjen, S Paque, D Weijers, Auxin response factors: output control in auxin biology. *J.*  
657 *Exp. Bot.* **69**, 179–188 (2018).
- 658 6. MH Nanao, et al., Structural basis for oligomerization of auxin transcriptional regulators. *Nat.*  
659 *Commun.* **5**, 3617 (2014).
- 660 7. DA Korasick, et al., Molecular basis for AUXIN RESPONSE FACTOR protein interaction and  
661 the control of auxin response repression. *Proc. Natl. Acad. Sci.* **111**, 5427–5432 (2014).
- 662 8. M Han, et al., Structural basis for the auxin-induced transcriptional regulation by Aux/IAA17.  
663 *Proc. Natl. Acad. Sci.* **111**, 18613–18618 (2014).
- 664 9. DC Dinesh, et al., Solution structure of the PsIAA4 oligomerization domain reveals interaction  
665 modes for transcription factors in early auxin response. *Proc. Natl. Acad. Sci.* **112**, 6230–6235  
666 (2015).
- 667 10. T Ulmasov, G Hagen, TJ Guilfoyle, Activation and repression of transcription by auxin-response  
668 factors. *Proc. Natl. Acad. Sci.* **96**, 5844–5849 (1999).
- 669 11. SB Tiwari, G Hagen, T Guilfoyle, The Roles of Auxin Response Factor Domains in Auxin-  
670 Responsive Transcription. *The Plant Cell* **15**, 533–543 (2003).
- 671 12. T Ulmasov, G Hagen, TJ Guilfoyle, ARF1, a transcription factor that binds to auxin response  
672 elements. *Science* **276**, 1865–1868 (1997).
- 673 13. N Ballas, LM Wong, A Theologis, Identification of the Auxin-responsive Element, AuxRE, in  
674 the Primary indoleacetic Acid-inducible Gene, PS-IAA4/5, of Pea (*Pisum sativum*). *J. Mol. Biol.*  
675 **233**, 580–596 (1993).
- 676 14. Y Li, ZB Liu, X Shi, G Hagen, TJ Guilfoyle, An Auxin-Inducible Element in Soybean SAUR  
677 Promoters. *Plant Physiol.* **106**, 37–43 (1994).
- 678 15. T Ulmasov, ZB Liu, G Hagen, TJ Guilfoyle, Composite structure of auxin response elements.  
679 *The Plant Cell* **7**, 1611–1623 (1995).
- 680 16. T Ulmasov, G Hagen, TJ Guilfoyle, Dimerization and DNA binding of auxin response factors.  
681 *The Plant J.* **19**, 309–319 (1999).
- 682 17. DR Boer, et al., Structural basis for DNA binding specificity by the auxin-dependent ARF  
683 transcription factors. *Cell* **156** (2014).
- 684 18. JM Franco-Zorrilla, et al., DNA-binding specificities of plant transcription factors and their  
685 potential to define target genes. *Proc. Natl. Acad. Sci.* **111**, 2367–2372 (2014).
- 686 19. R O'Malley, et al., Cistrome and epistrome features shape the regulatory DNA landscape.  
687 *Cell* **165**, 1280–1292 (2016).
- 688 20. CY Liao, et al., Reporters for sensitive and quantitative measurement of auxin response. *Nat.*  
689 *Methods* **12**, 207–210 (2015).

21. J Liu, et al., Natural variation in *ARF18* gene simultaneously affects seed weight and siliqua  
690 length in polyploid rapeseed. *Proc. Natl. Acad. Sci.* **112**, E5123–E5132 (2015). 691
22. H Kato, et al., Design principles of a minimal auxin response system. *Nat. Plants* **6**, 473–482  
692 (2020). 693
23. NT Krogan, W Ckurshumova, D Marcos, AE Caragea, T Berleth, Deletion of MP/ARF5  
694 domains III and IV reveals a requirement for aux/IAA regulation in arabidopsis leaf vascular  
695 patterning. *New Phytol.* **194**, 391–401 (2012). 696
24. E Pierre-Jerome, BL Moss, A Lancot, A Hageman, JL Nemhauser, Functional analysis  
697 of molecular interactions in synthetic auxin response circuits. *Proc. Natl. Acad. Sci.* **113**,  
698 11354–11359 (2016). 699
25. S Farooq, J Hohlbein, Camera-based single-molecule FRET detection with improved time  
700 resolution. *Phys. Chem. Chem. Phys.* **17**, 27862–27872 (2015). 701
26. J Hohlbein, TD Craggs, T Cordes, Alternating-laser excitation: single-molecule FRET and  
702 beyond. *Chem. Soc. Rev.* **43**, 1156–1171 (2014). 703
27. AN Kapanidis, et al., Fluorescence-aided molecule sorting: Analysis of structure and interac-  
704 tions by alternating-laser excitation of single molecules. *Proc. Natl. Acad. Sci.* **101**, 8936–8941  
705 (2004). 706
28. I Rasnik, SA McKinney, T Ha, Nonblinking and long-lasting single-molecule fluorescence  
707 imaging. *Nat. Methods* **3**, 891–893 (2006). 708
29. T Cordes, J Vogelsang, P Tinnefeld, On the Mechanism of Trolox as Antiblinking and Anti-  
709 bleaching Reagent. *J. Am. Chem. Soc.* **131**, 5018–5019 (2009) Publisher: American  
710 Chemical Society. 711
30. GW Evans, J Hohlbein, T Craggs, L Aigrain, AN Kapanidis, Real-time single-molecule studies  
712 of the motions of DNA polymerase fingers illuminate DNA synthesis mechanisms. *Nucleic*  
713 *Acids Res.* **43**, 5998–6008 (2015). 714
31. JW van de Meent, J Bronson, C Wiggins, R Gonzalez, Empirical bayes methods enable  
715 advanced population-level analyses of single-molecule FRET experiments. *Biophys. J.* **106**,  
716 1327–1337 (2014). 717
32. J González Fernández, et al., NCD-SWEET Beamline Upgrade. *Proc. Mech. Eng. Des.*  
718 *Synchrotron Radiat. Equip. Instrumentation MEDSI2018* (2018). 719
33. N Gonzalez, et al., Beam Conditioning Optics at the ALBA NCD-SWEET Beamline. *Proc.*  
720 *Mech. Eng. Des. Synchrotron Radiat. Equip. Instrumentation MEDSI2018* (2018). 721
34. D Franke, et al., ATASAS 2.8: a comprehensive data analysis suite for small-angle scattering  
722 from macromolecular solutions. *J. Appl. Crystallogr.* **50**, 1212–1225 (2017). 723
35. D Svergun, C Barberato, MHJ Koch, CRY SOL – a Program to Evaluate X-ray Solution Scattering  
724 of Biological Macromolecules from Atomic Coordinates. *J. Appl. Crystallogr.* **28**, 768–773  
725 (1995). 726
36. PV Konarev, VV Volkov, AV Sokolova, MHJ Koch, DI Svergun, PRIMUS: a Windows PC-based  
727 system for small-angle scattering data analysis. *J. Appl. Crystallogr.* **36**, 1277–1282 (2003). 728
37. A Freire-Rios, et al., Architecture of DNA elements mediating ARF transcription factor binding  
729 and auxin-responsive gene expression in *Arabidopsis*. *Proc. Natl. Acad. Sci.* **117**, 202009554  
730 (2020). 731
38. D Colquhoun, KA Dowsland, M Beato, AJR Pledest, How to impose microscopic reversibility  
732 in complex reaction mechanisms. *Biophys. J.* **86**, 3510–3518 (2004). 733
39. SP Hancock, DA Hiller, JJ Perona, L Jen-Jacobson, The Energetic Contribution of Induced  
734 Electrostatic Asymmetry to DNA Bending by a Site-Specific Protein. *J. Mol. Biol.* **406**, 285–312  
735 (2011). 736
40. G Schreiber, G Haran, HX Zhou, Fundamental aspects of protein-protein association kinetics.  
737 *Chem. Rev.* **109**, 839–860 (2009). 738
41. HX Zhou, X Pang, Electrostatic Interactions in Protein Structure, Folding, Binding, and Con-  
739 densation. *Chem. Rev.* **118**, 1691–1741 (2018). 740
42. SK Mutte, et al., Origin and evolution of the nuclear auxin response system. *eLife* **7**, e33399  
741 (2018). 742
43. F Ouellet, PJ Overvoorde, A Theologis, IAA17/AXR3: Biochemical Insight into an Auxin Mutant  
743 Phenotype. *The Plant Cell* **13**, 829–841 (2001). 744
44. T Hamann, E Benkova, I Bäurle, M Kientz, G Jürgens, The Arabidopsis BODENLOS gene  
745 encodes an auxin response protein inhibiting MONOPTEROS-mediated embryo patterning.  
746 *Genes & Dev.* **16**, 1610–1615 (2002). 747
45. K Tatematsu, et al., MASSUGU2 Encodes Aux/IAA19, an Auxin-Regulated Protein That  
748 Functions Together with the Transcriptional Activator NPH4/ARF7 to Regulate Differential  
749 Growth Responses of Hypocotyl and Formation of Lateral Roots in Arabidopsis thaliana. *The*  
750 *Plant Cell* **16**, 379–393 (2004). 751
46. CS Hardtke, et al., Overlapping and non-redundant functions of the Arabidopsis auxin response  
752 factors MONOPTEROS and NONPHOTOTROPIC HYPOCOTYL 4. *Development* **131**, 1089–  
753 1100 (2004). 754
47. D Weijers, et al., Developmental specificity of auxin response by pairs of ARF and Aux/IAA  
755 transcriptional regulators. *The EMBO J.* **24**, 1874–1885 (2005). 756

- 757 48. H Fukaki, Y Nakao, Y Okushima, A Theologis, M Tasaka, Tissue-specific expression of  
758 stabilized SOLITARY-ROOT/IAA14 alters lateral root development in Arabidopsis. *The Plant J.*  
759 **44**, 382–395 (2005).
- 760 49. H Muto, et al., Fluorescence Cross-Correlation Analyses of the Molecular Interaction between  
761 an Aux/IAA Protein, MSG2/IAA19, and Protein–Protein Interaction Domains of Auxin Response  
762 Factors of Arabidopsis Expressed in HeLa Cells. *Plant Cell Physiol.* **47**, 1095–1101 (2006).
- 763 50. T Uehara, Y Okushima, T Mimura, M Tasaka, H Fukaki, Domain II Mutations in CRANE/IAA18  
764 Suppress Lateral Root Formation and Affect Shoot Development in Arabidopsis thaliana. *Plant*  
765 *Cell Physiol.* **49**, 1025–1038 (2008).
- 766 51. C Shen, et al., Functional analysis of the structural domain of ARF proteins in rice (*Oryza*  
767 *sativa* L.). *J. Exp. Bot.* **61**, 3971–3981 (2010).
- 768 52. T Vernoux, et al., The auxin signalling network translates dynamic input into robust patterning  
769 at the shoot apex. *Mol. Syst. Biol.* **7**, 508 (2011).
- 770 53. S Piya, SK Shrestha, B Binder, CNJ Stewart, T Hwezi, Protein-protein interaction and gene  
771 co-expression maps of ARFs and aux/IAAs in arabidopsis. *Front. Plant Sci.* **5** (2014).
- 772 54. T Ulmasov, J Murrett, G Hagen, TJ Guilfoyle, Aux/IAA proteins repress expression of reporter  
773 genes containing natural and highly active synthetic auxin response elements. *The Plant Cell*  
774 **9**, 1963–1971 (1997).
- 775 55. H Szemenyei, M Hannon, JA Long, TOPLESS Mediates Auxin-Dependent Transcriptional  
776 Repression During Arabidopsis Embryogenesis. *Science* **319**, 1384–1386 (2008).
- 777 56. A Stigliani, et al., Capturing auxin response factors syntax using DNA binding models. *Mol.*  
778 *Plant* **12**, 822–832 (2019).
- 779 57. GD Amoutzias, DL Robertson, Y Van de Peer, SG Oliver, Choose your partners: dimerization  
780 in eukaryotic transcription factors. *Trends Biochem. Sci.* **33**, 220–229 (2008).
- 781 58. L Strader, D Weijers, D Wagner, Plant transcription factors — being in the right place with the  
782 right company. *Curr. Opin. Plant Biol.* **65**, 102136 (2022).

DRAFT
